# Supplementary material for: Polystyrene as Graphene Film and 3D Graphene Sponge Precursor
Source: MDPI journal article supplement (doi:10.3390/nano9010101), 2019-01-16
Supplement: s1 [file s1]

Supporting information

## Polystyrene as Graphene Film and 3D Graphene Sponge Precursor

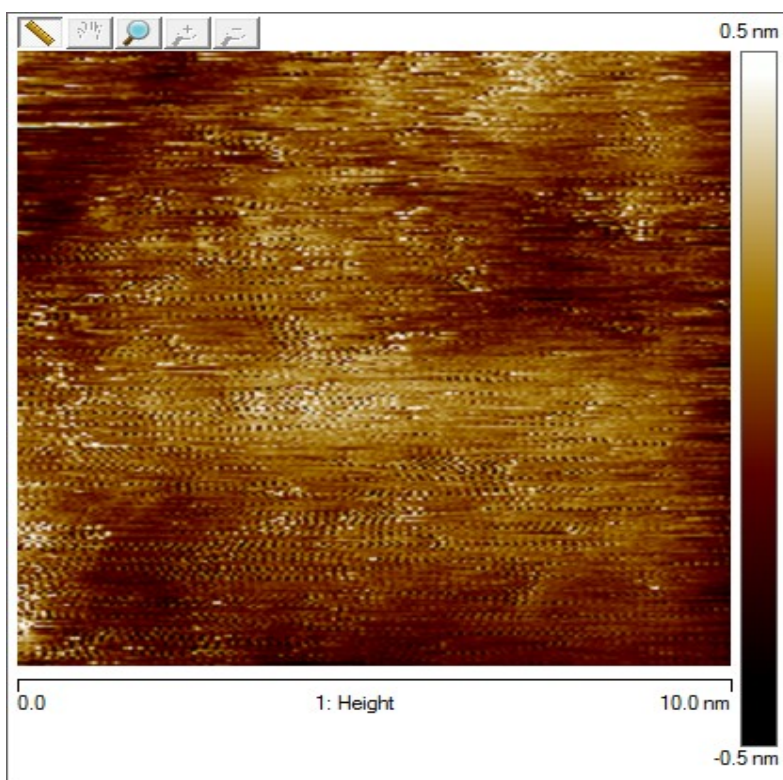

Figure S1. High resolution scan tunneling microscopy (STM) of defective graphene using polystyrene as precursor
